# Supplementary material
Source: PubMed Central journal article supplement (PMC5111720)

EE autosomes

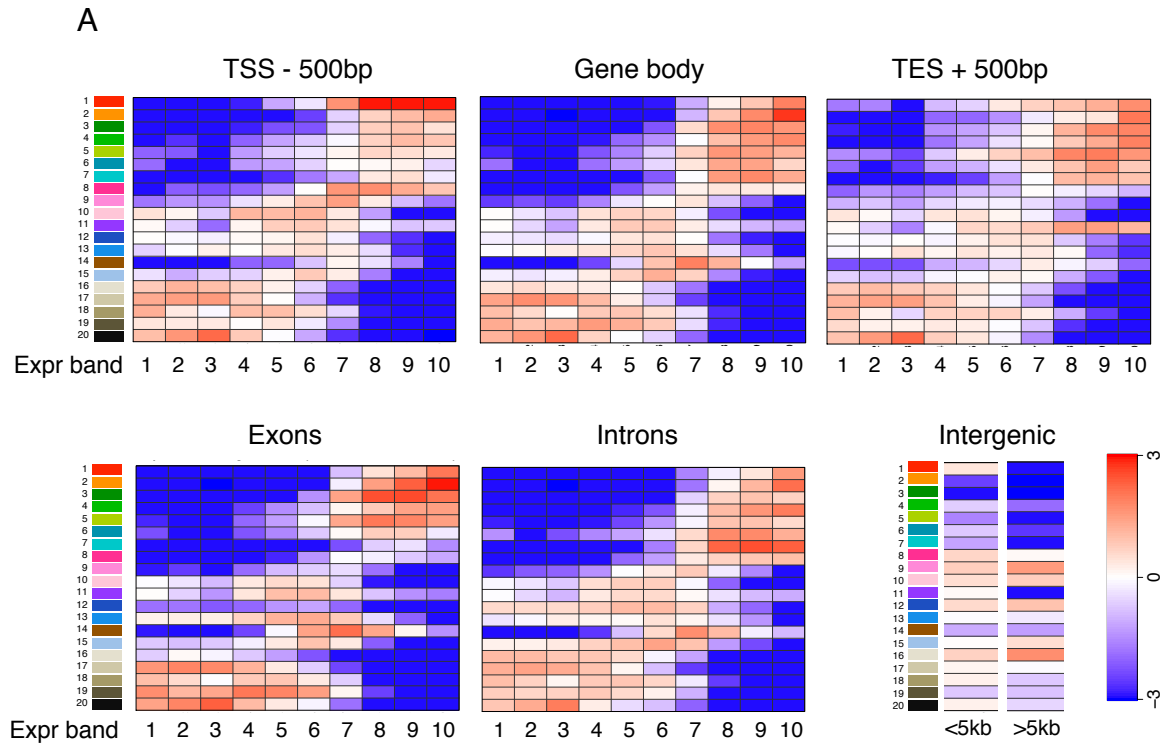

**B**

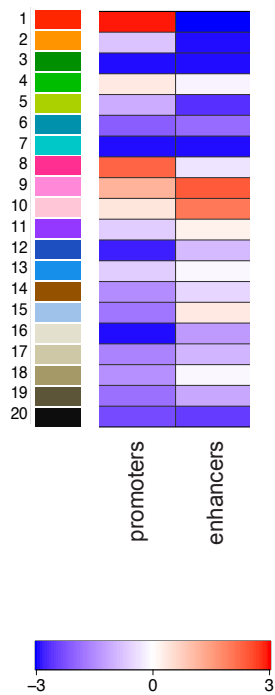

EE autosomes

C

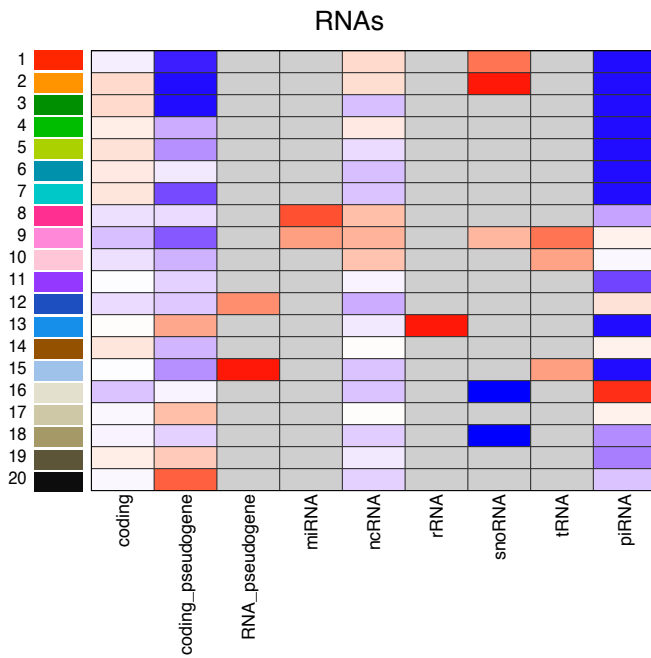

D

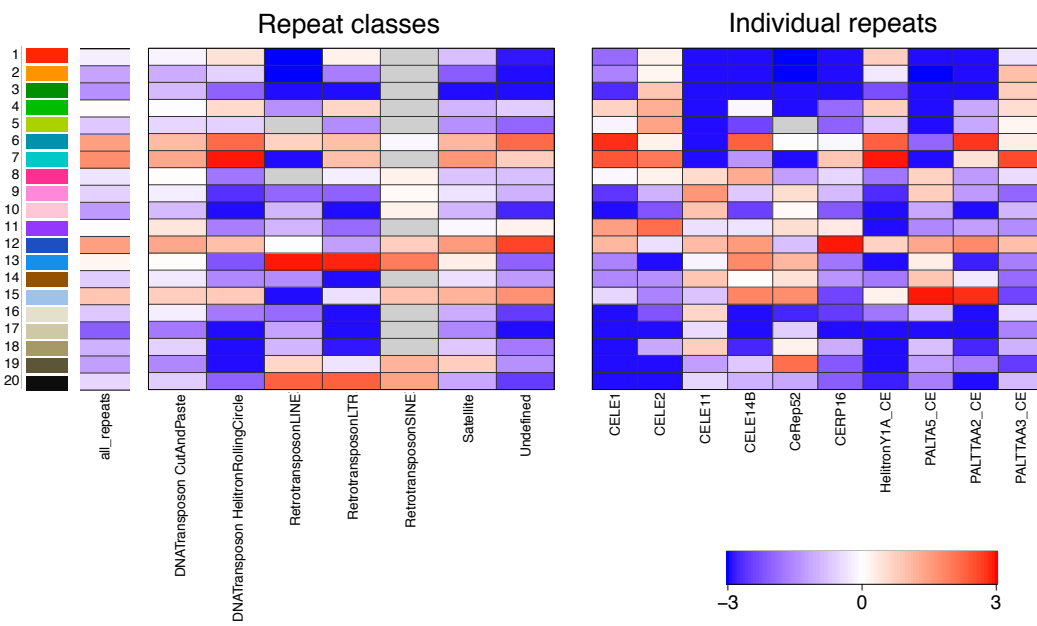

EE autosomes

E

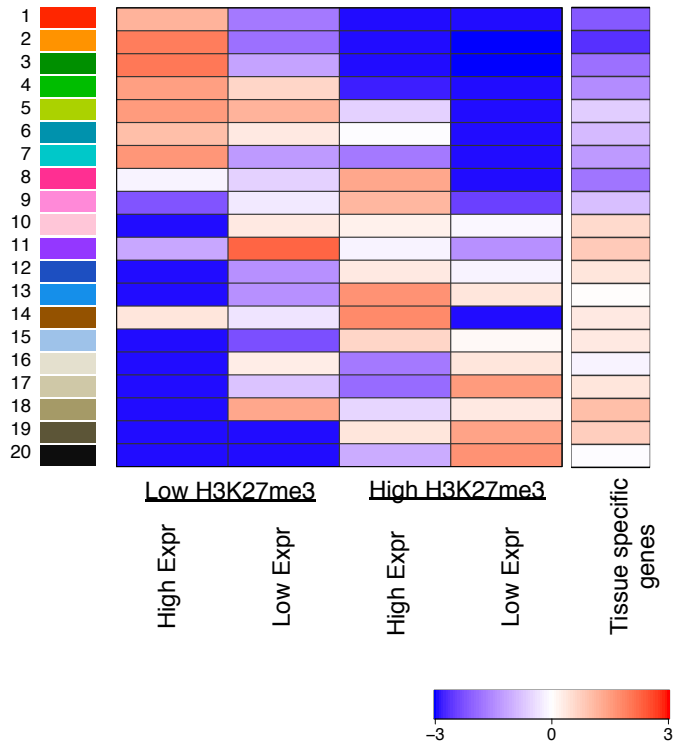

F

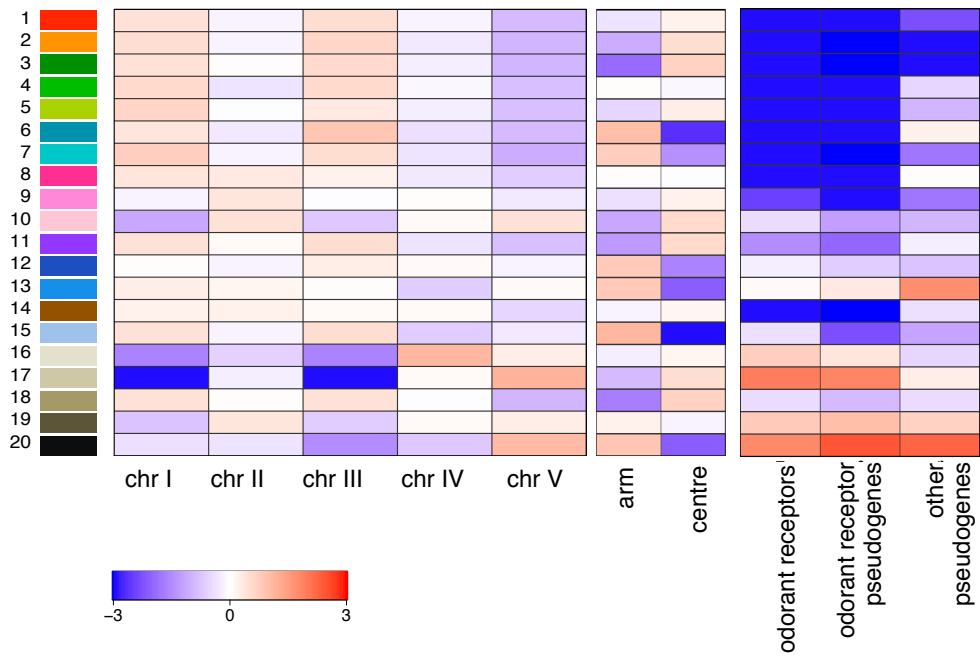

L3 autosomes

G

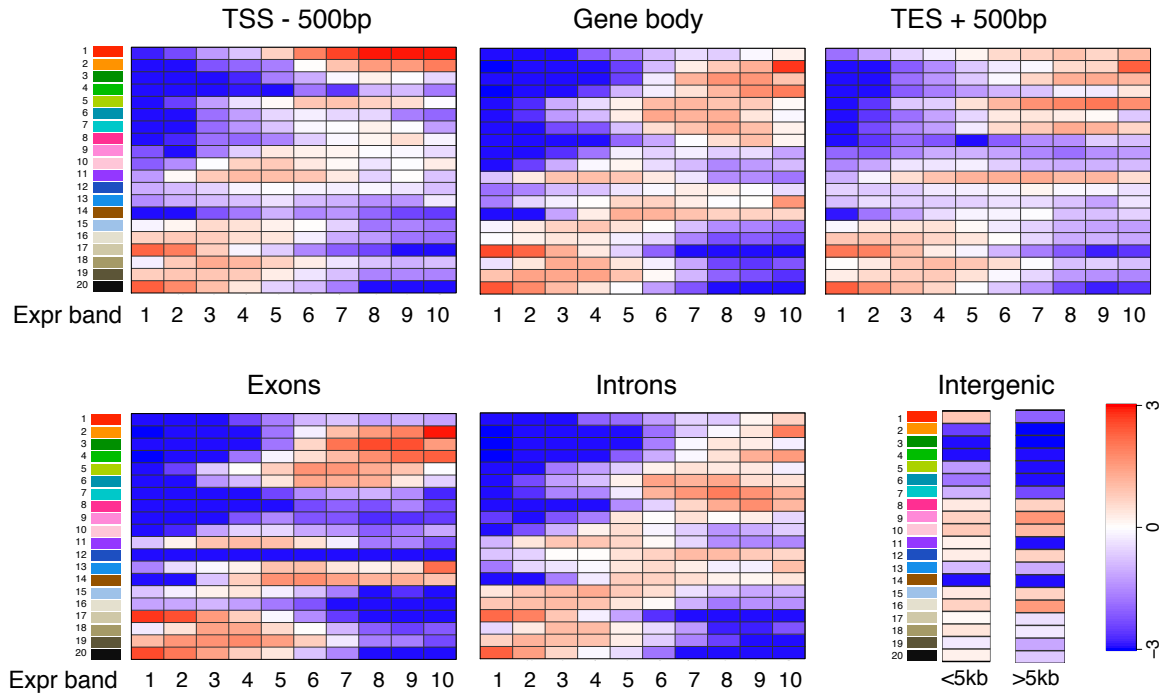

H

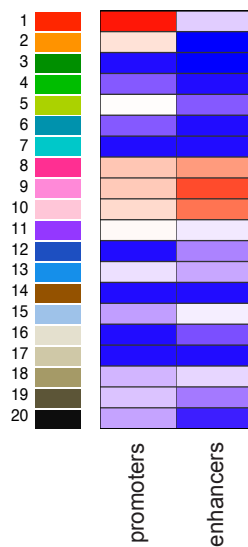

### L3 autosomes

I

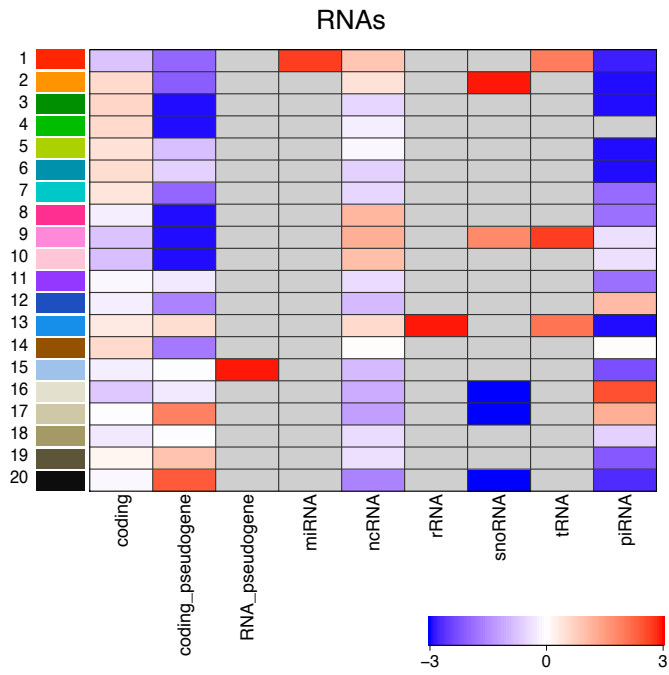

J

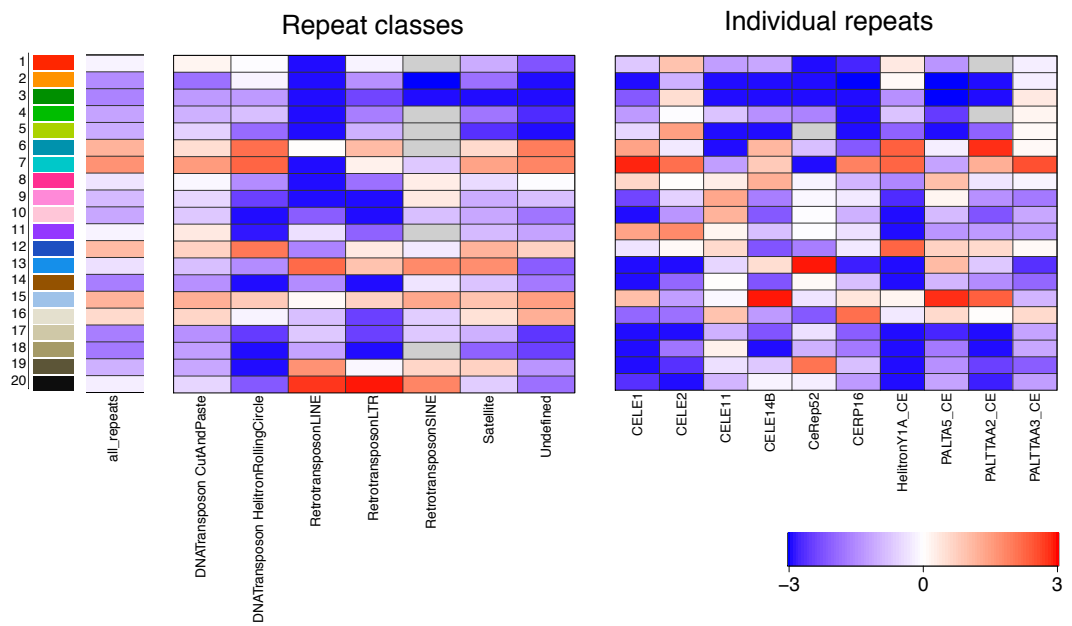

### L3 autosomes

K

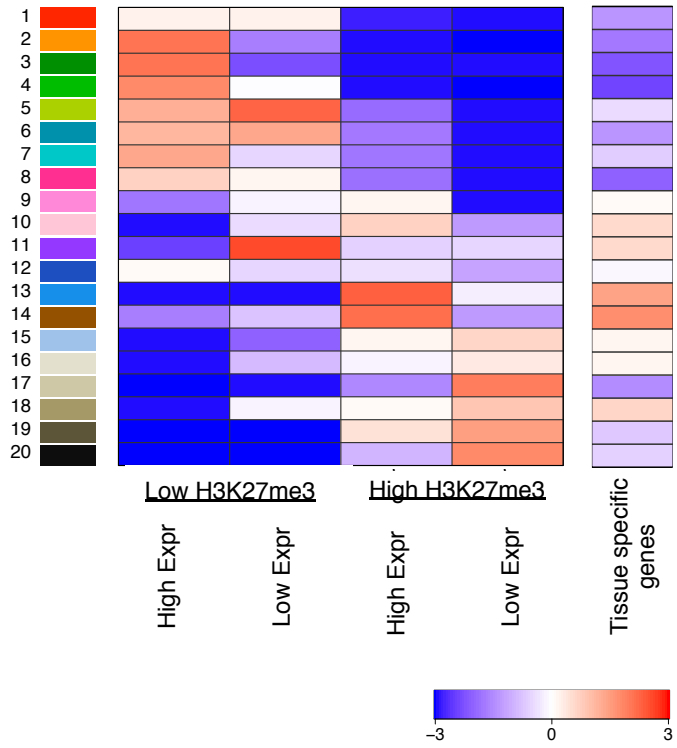

L

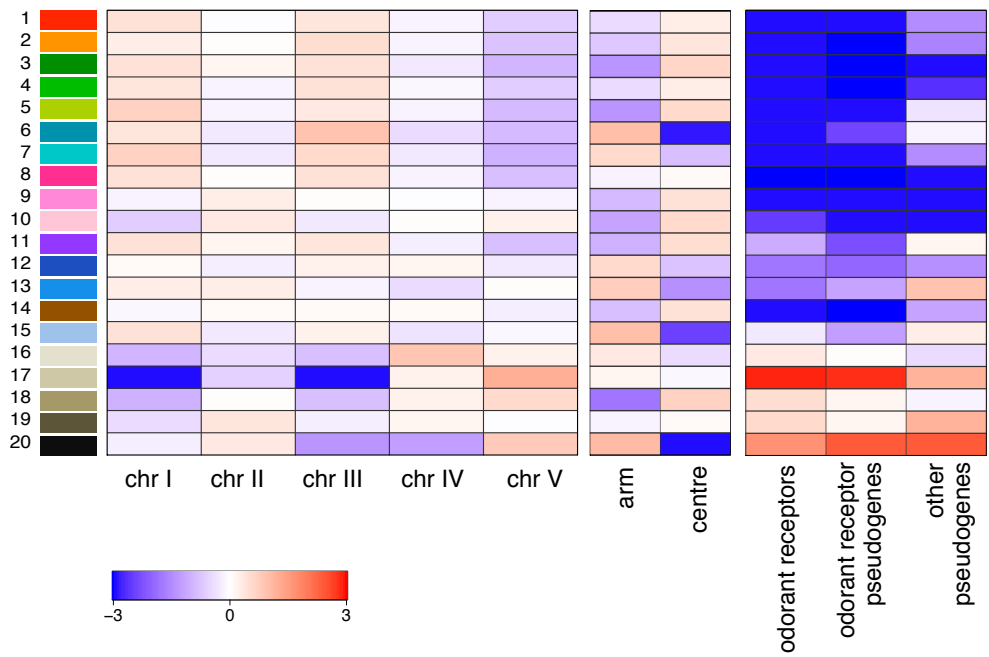

EE Chromosome X

M

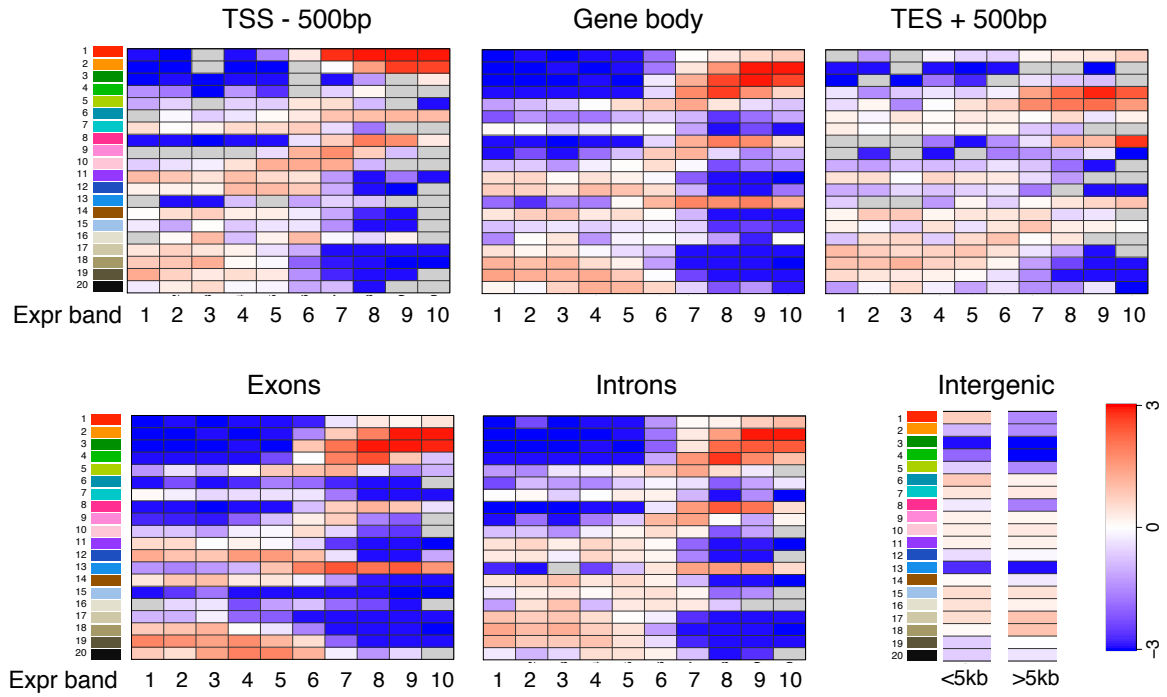

N

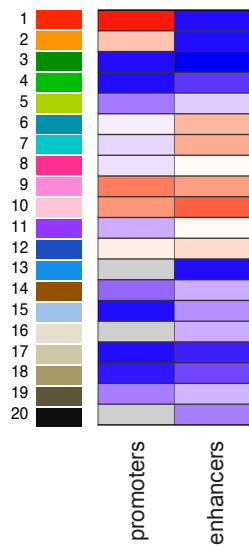





EE Chromosome X

Q

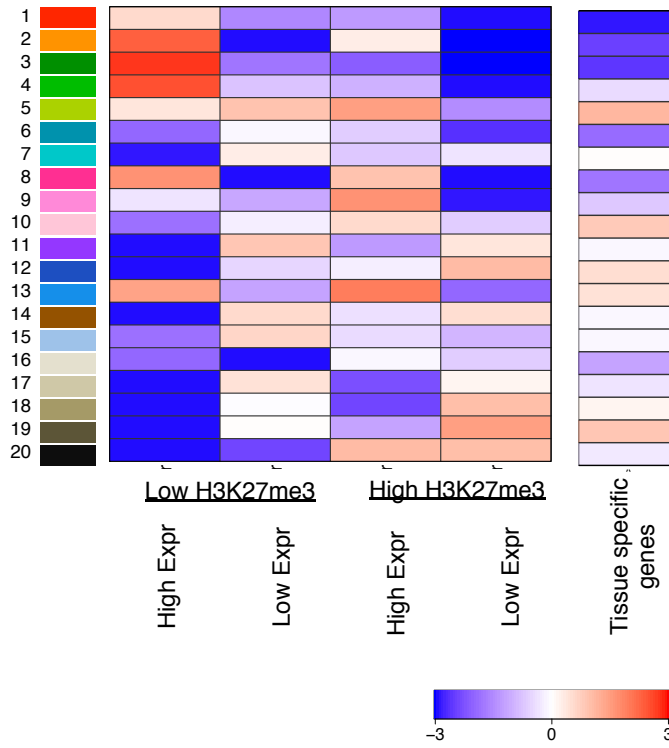

R

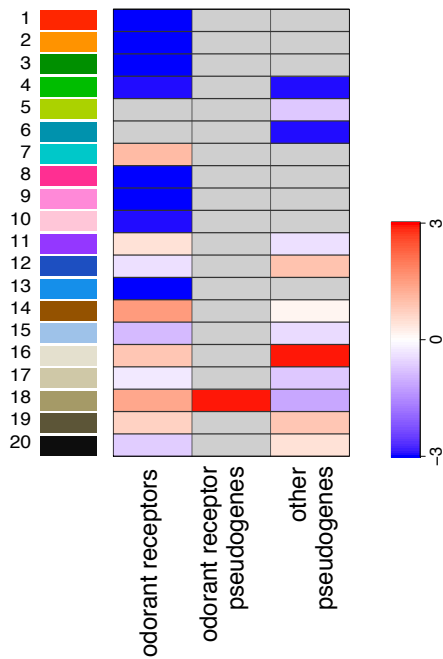

L3 Chromosome X

S

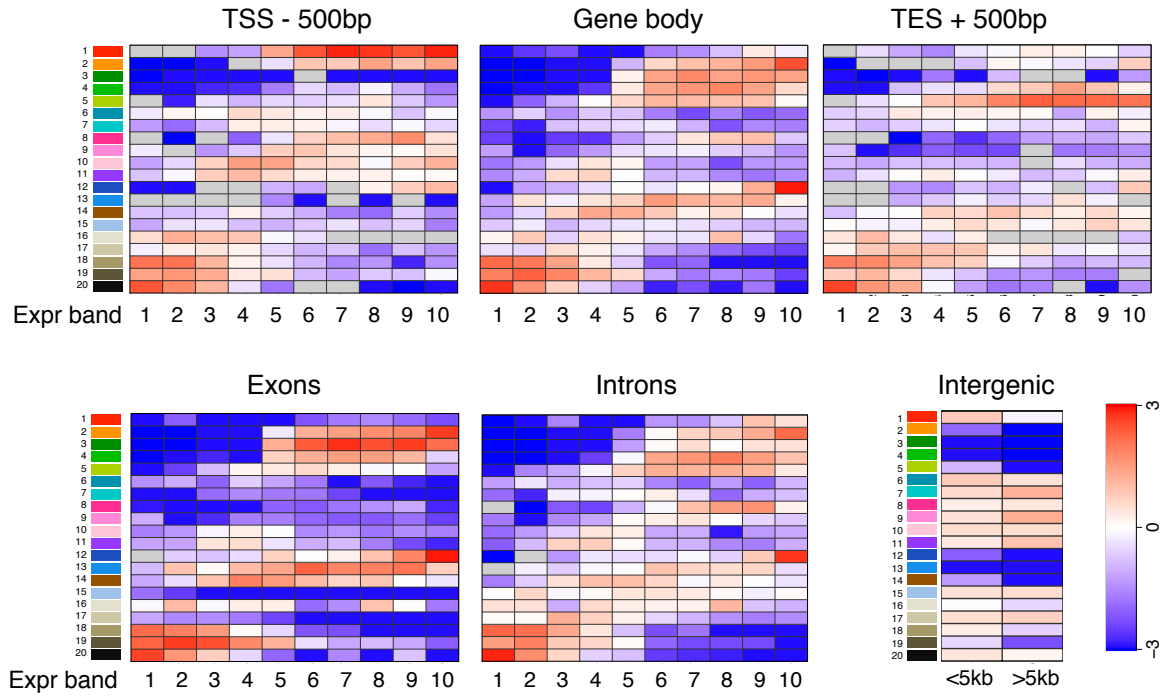

T

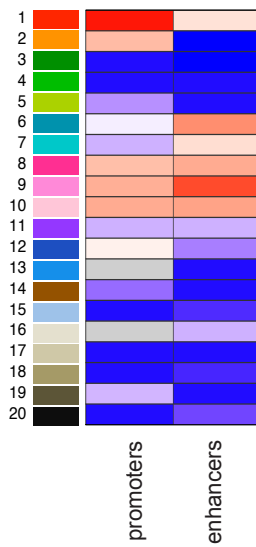

### L3 Chromosome X

U

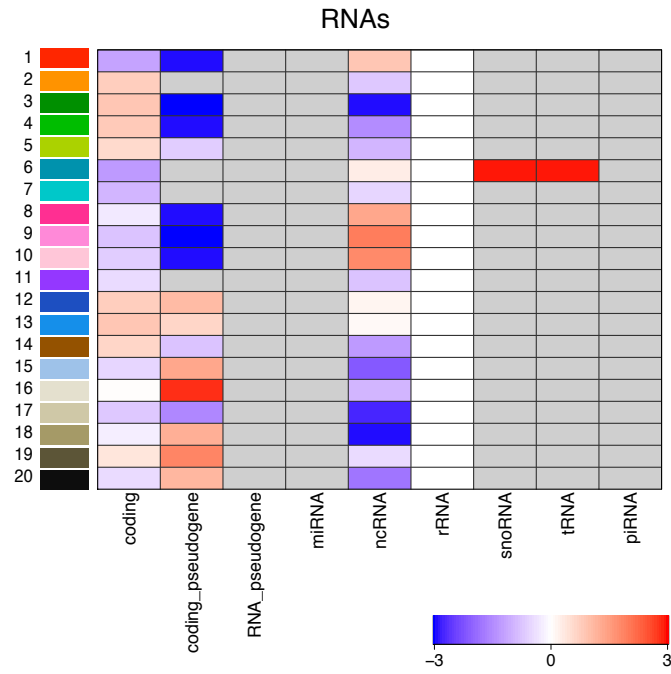

V

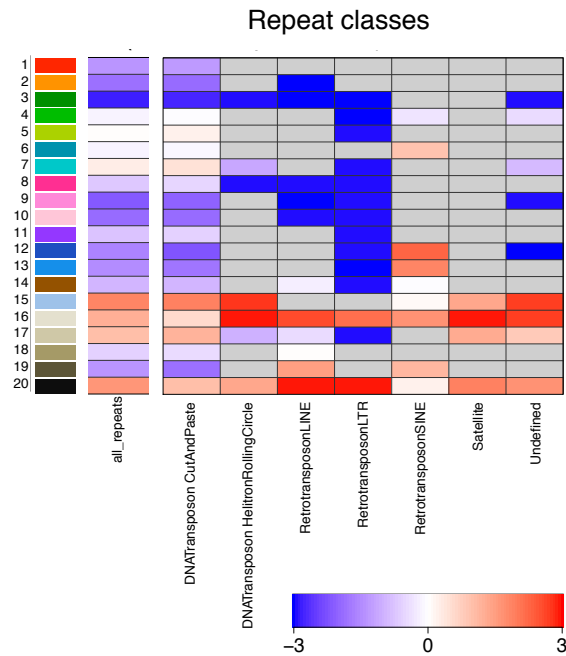

### L3 Chromosome X

W

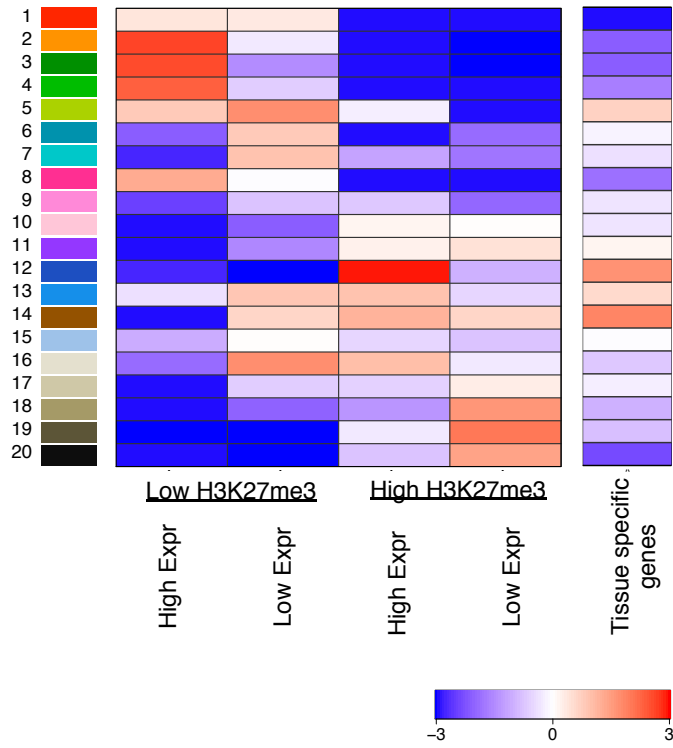

X

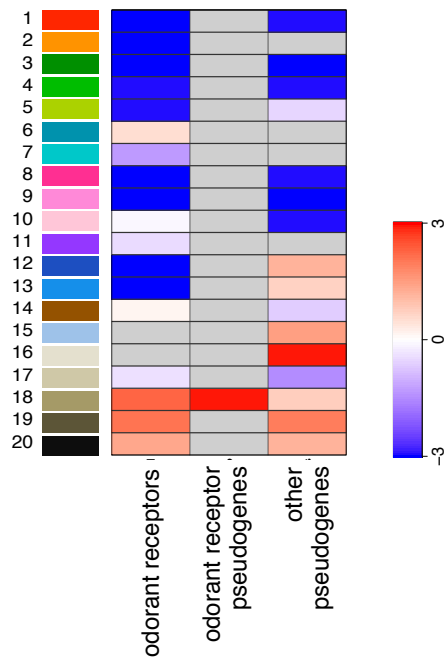

Supplement: pnas.1608162113.sfig04.pdf [file pnas.1608162113.sfig04.pdf]
