# Supplementary material
Source: PubMed Central journal article supplement (PMC5111720)

Evans Figure S1

### EE autosomes

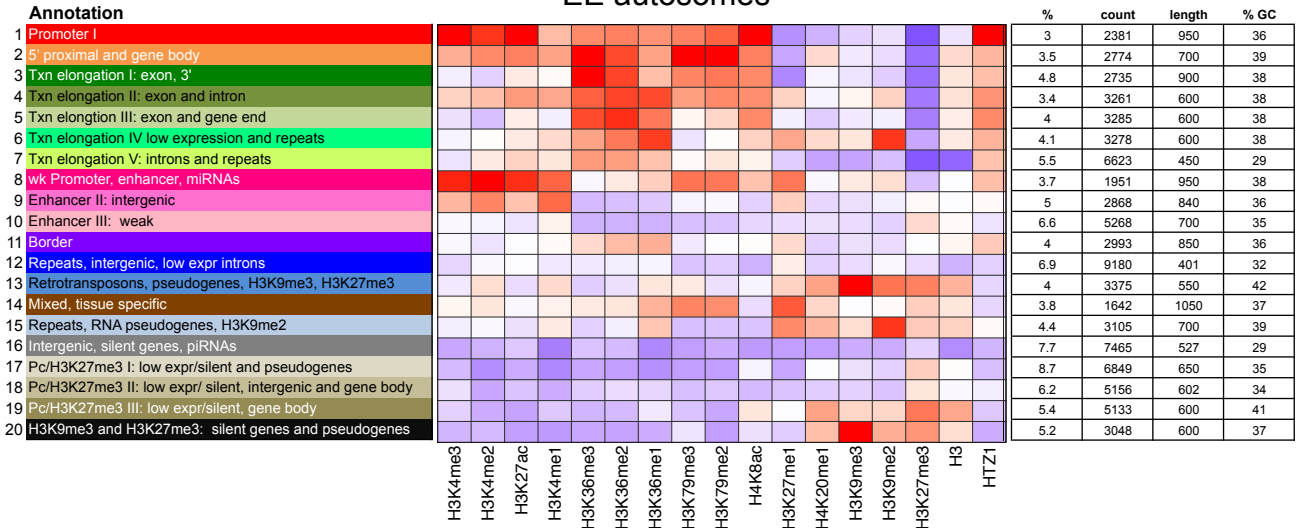

### L3 autosomes

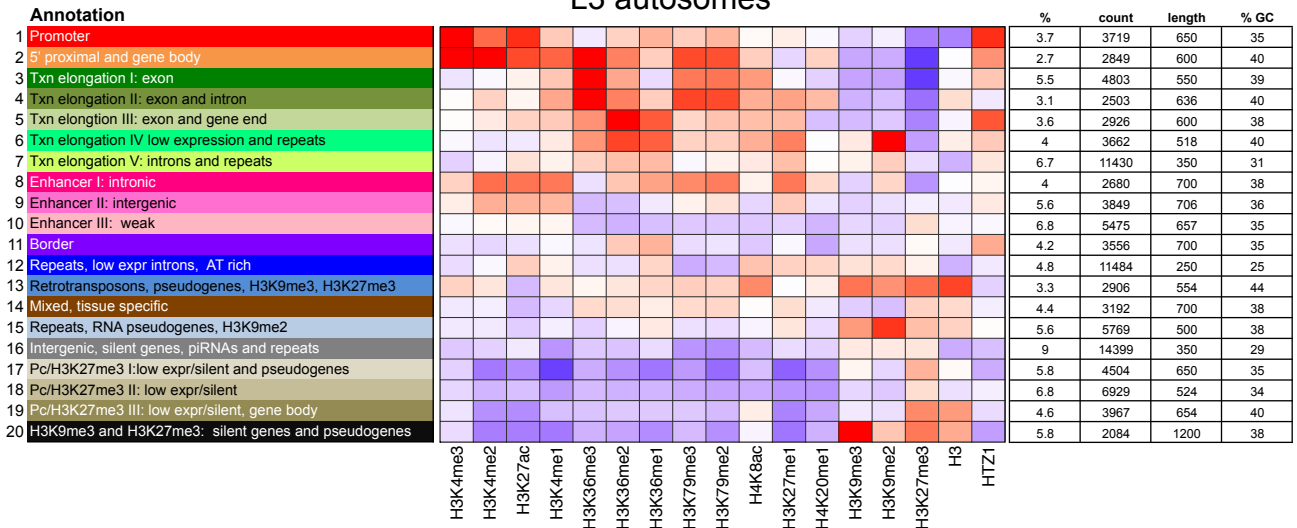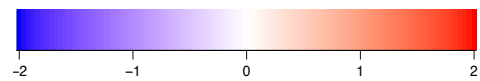

Evans Figure S1, continued

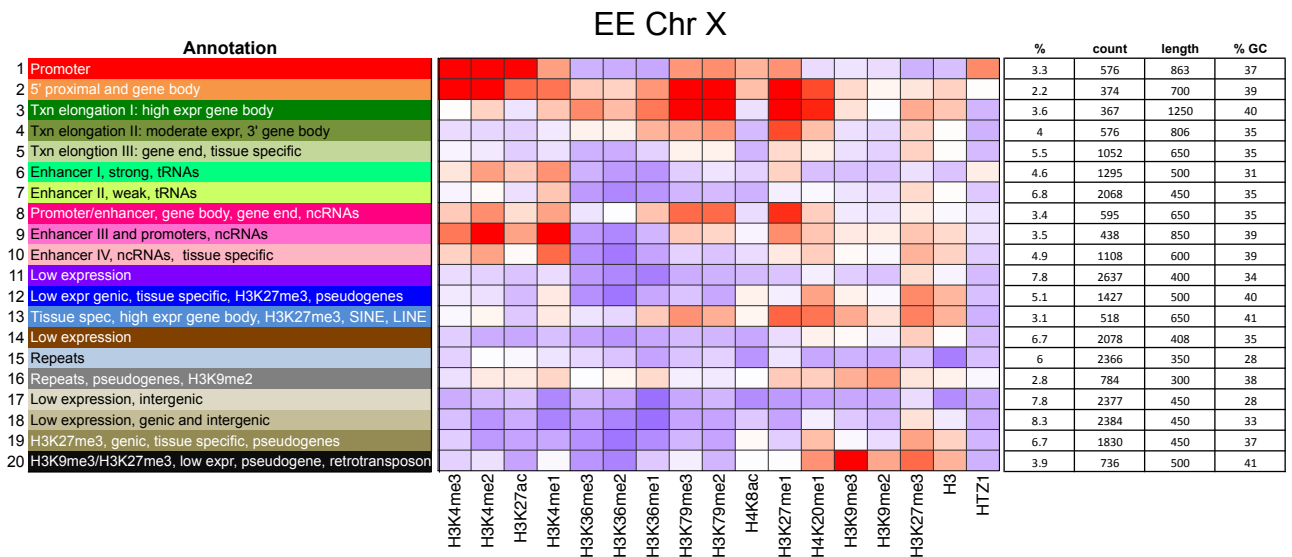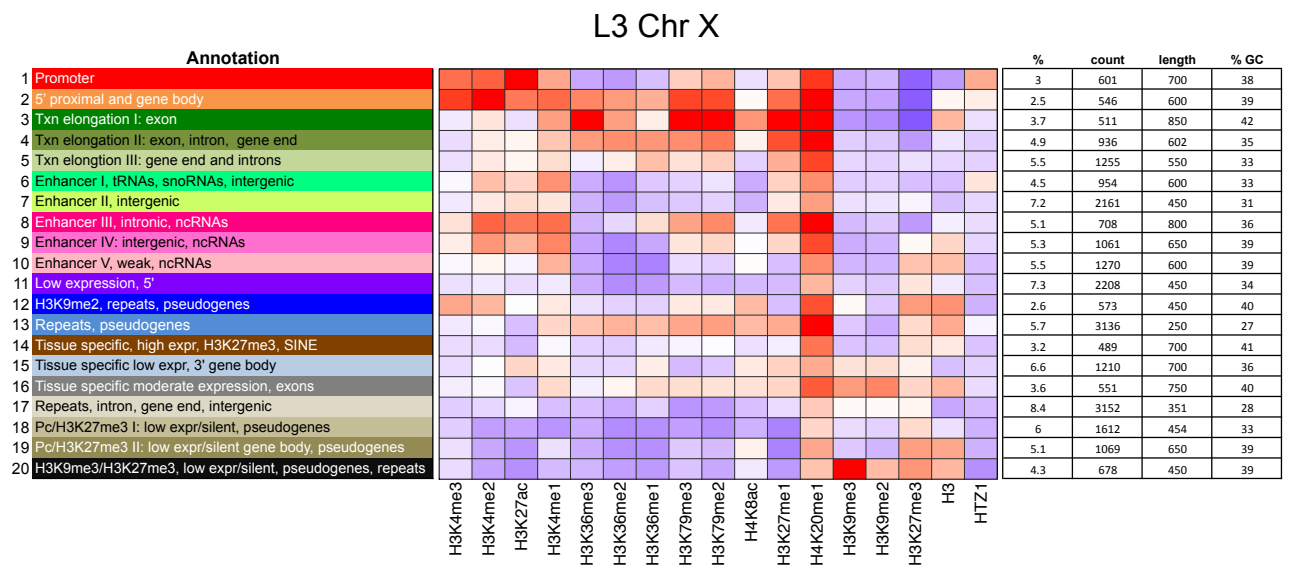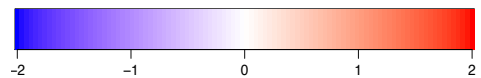

Supplement: pnas.1608162113.sfig01.pdf [file pnas.1608162113.sfig01.pdf]

Evans Figure S2

A

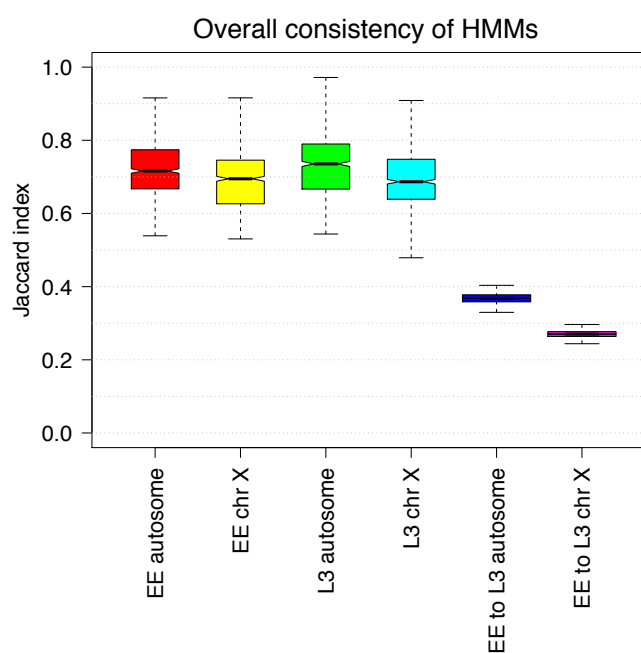

B

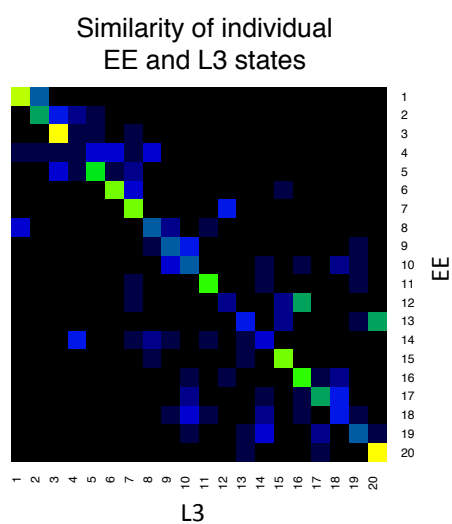

C

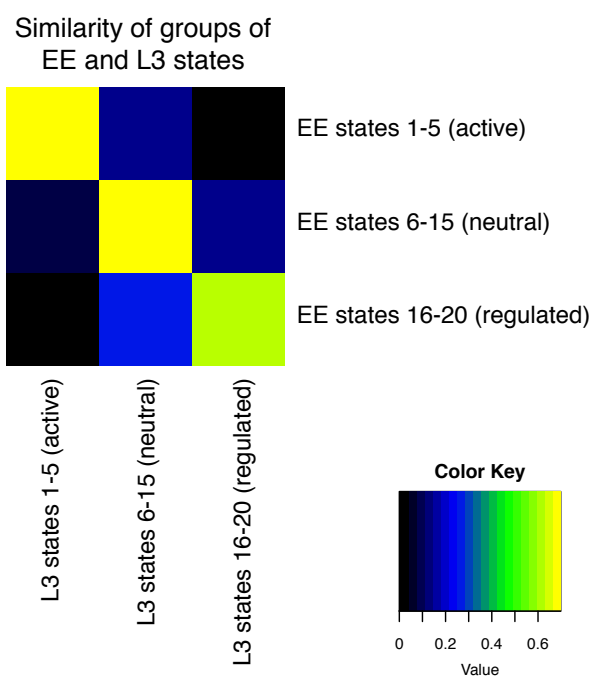

Supplement: pnas.1608162113.sfig02.pdf [file pnas.1608162113.sfig02.pdf]

Evans Figure S3

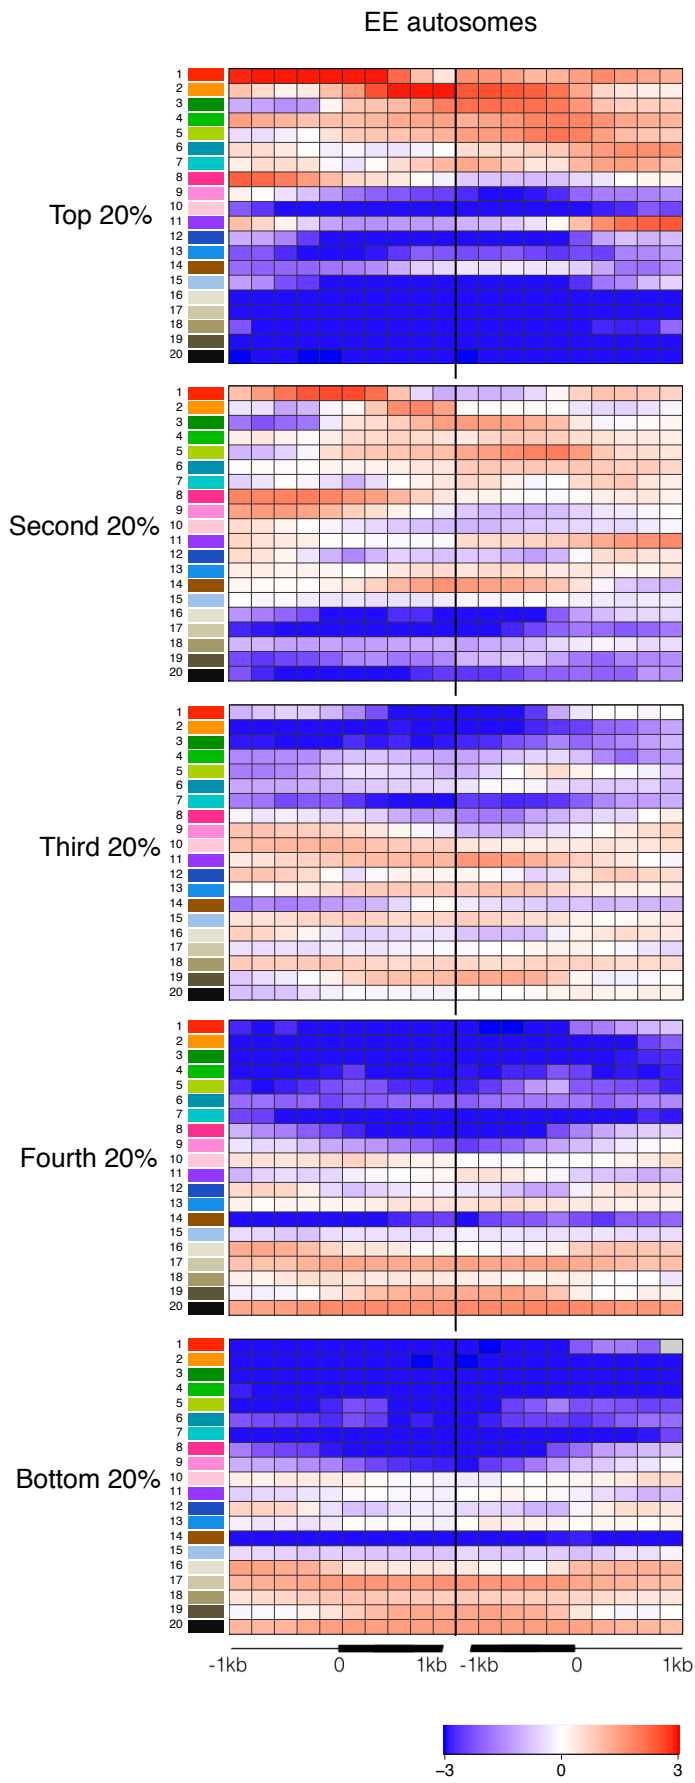

Evans Figure S3, continued

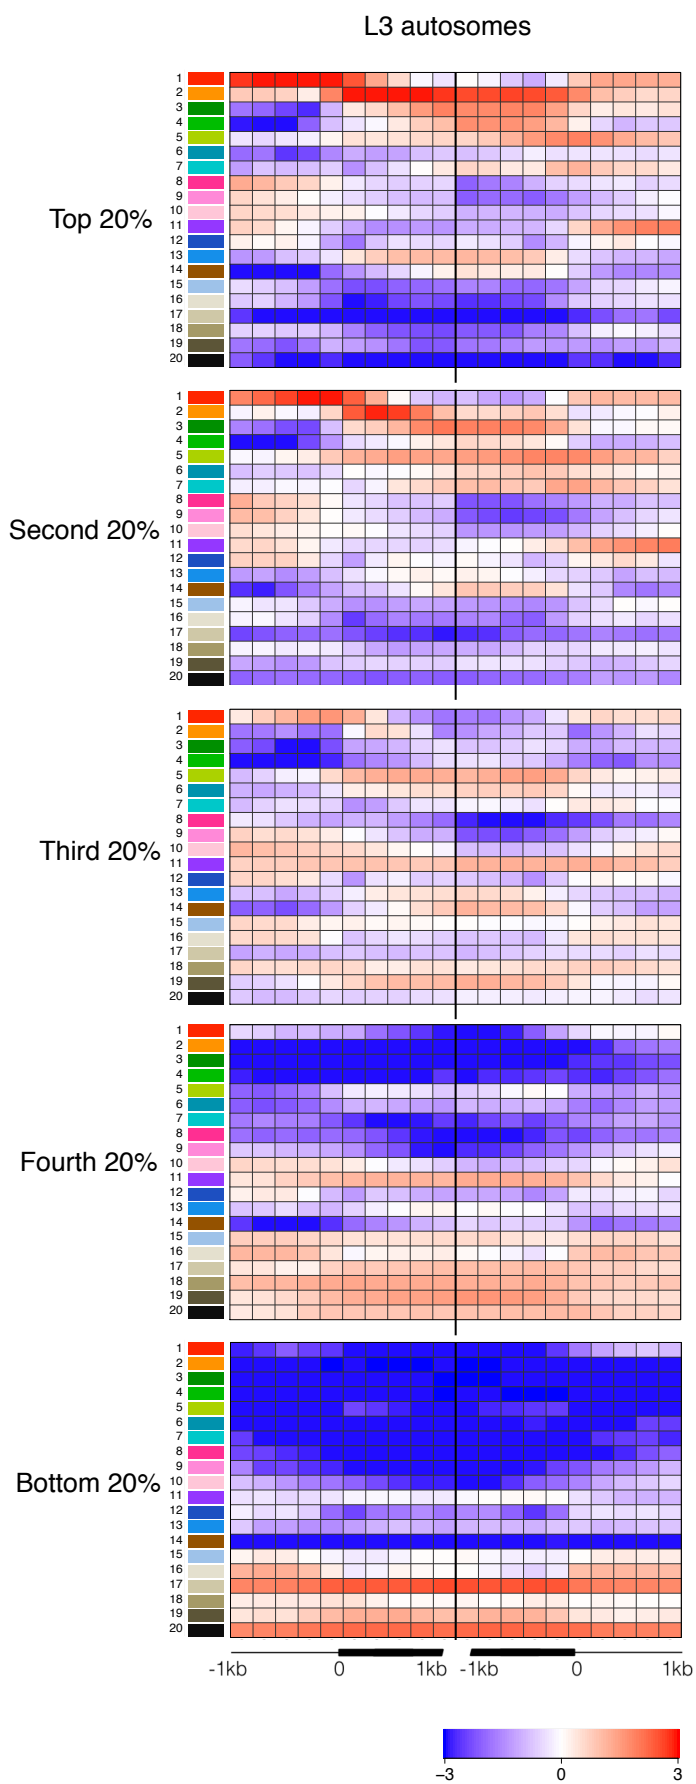

Evans Figure S3, continued

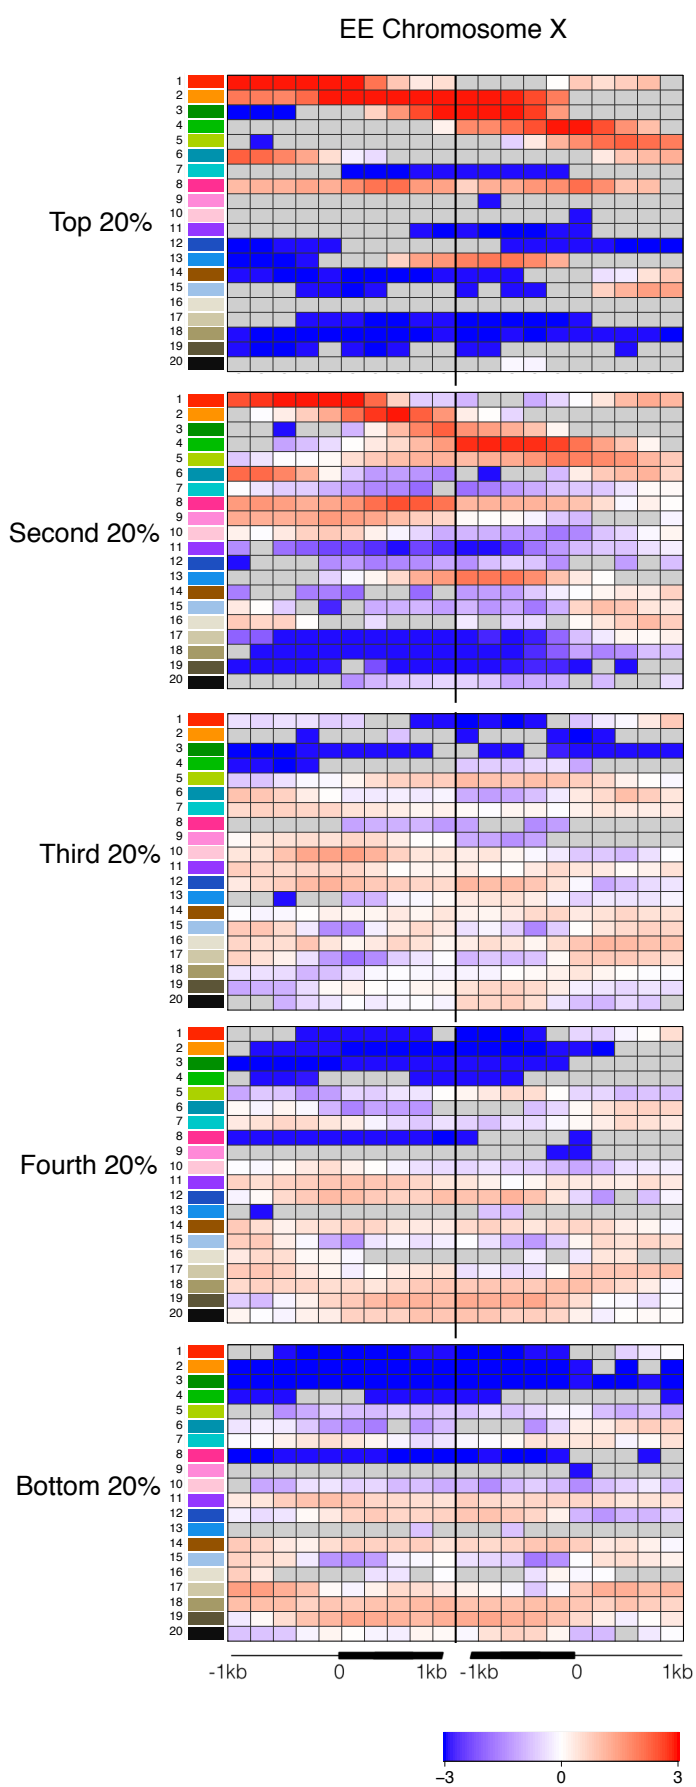

Evans Figure S3, continued

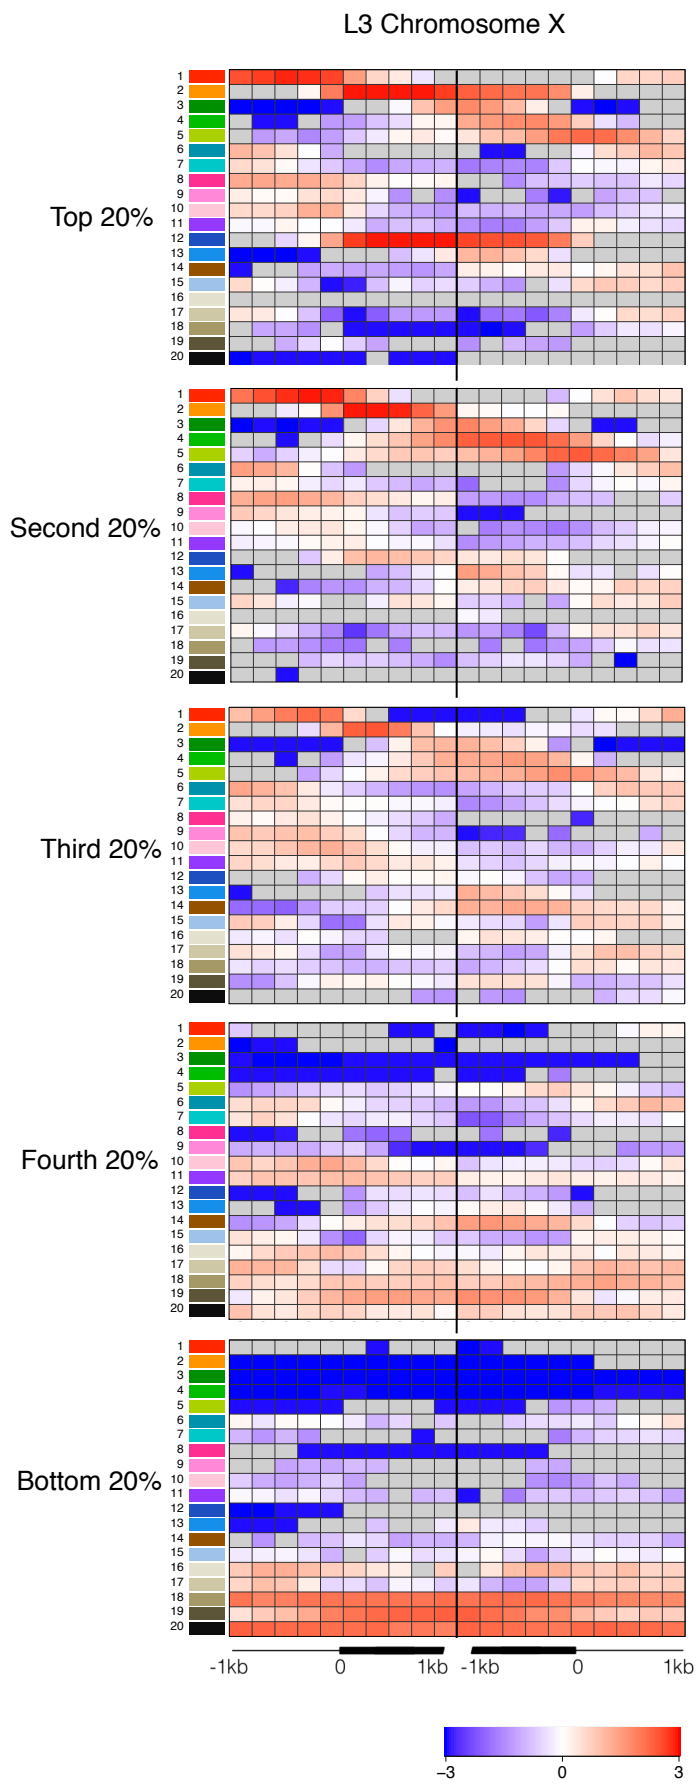

Supplement: pnas.1608162113.sfig03.pdf [file pnas.1608162113.sfig03.pdf]

Evans Figure S5

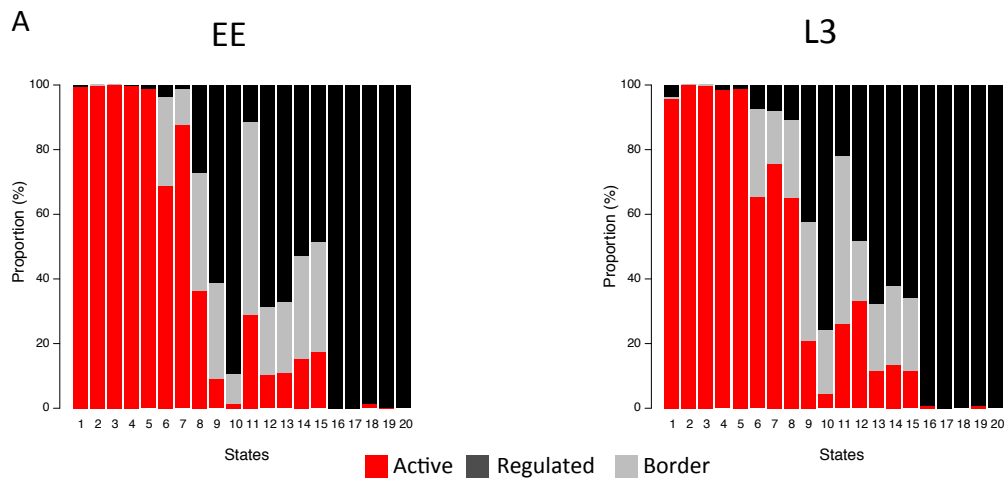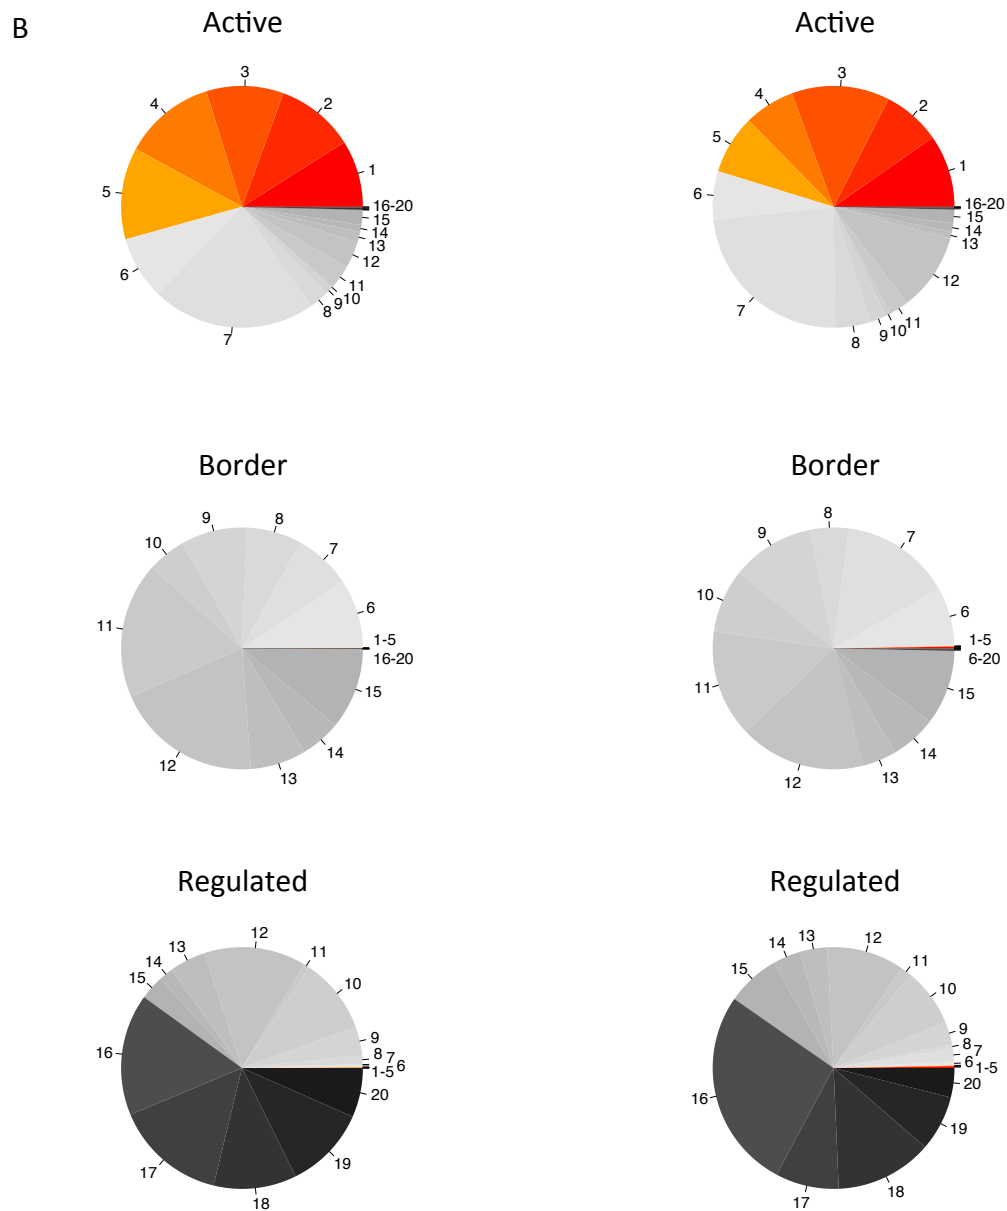

Supplement: pnas.1608162113.sfig05.pdf [file pnas.1608162113.sfig05.pdf]

EE autosomes

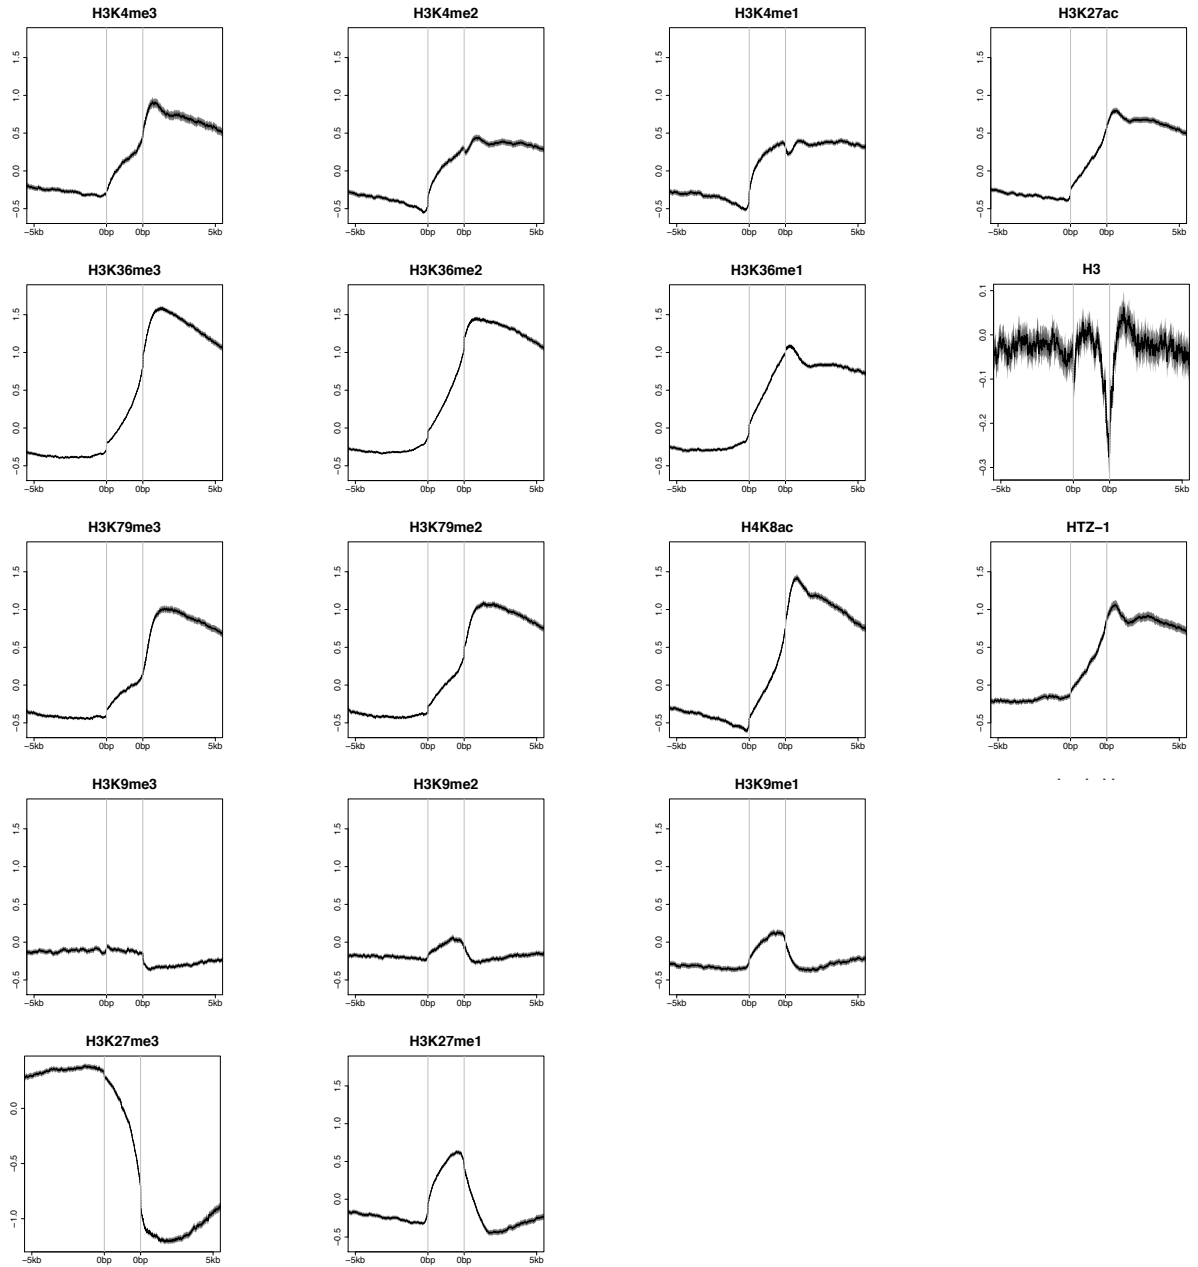

### L3 autosomes

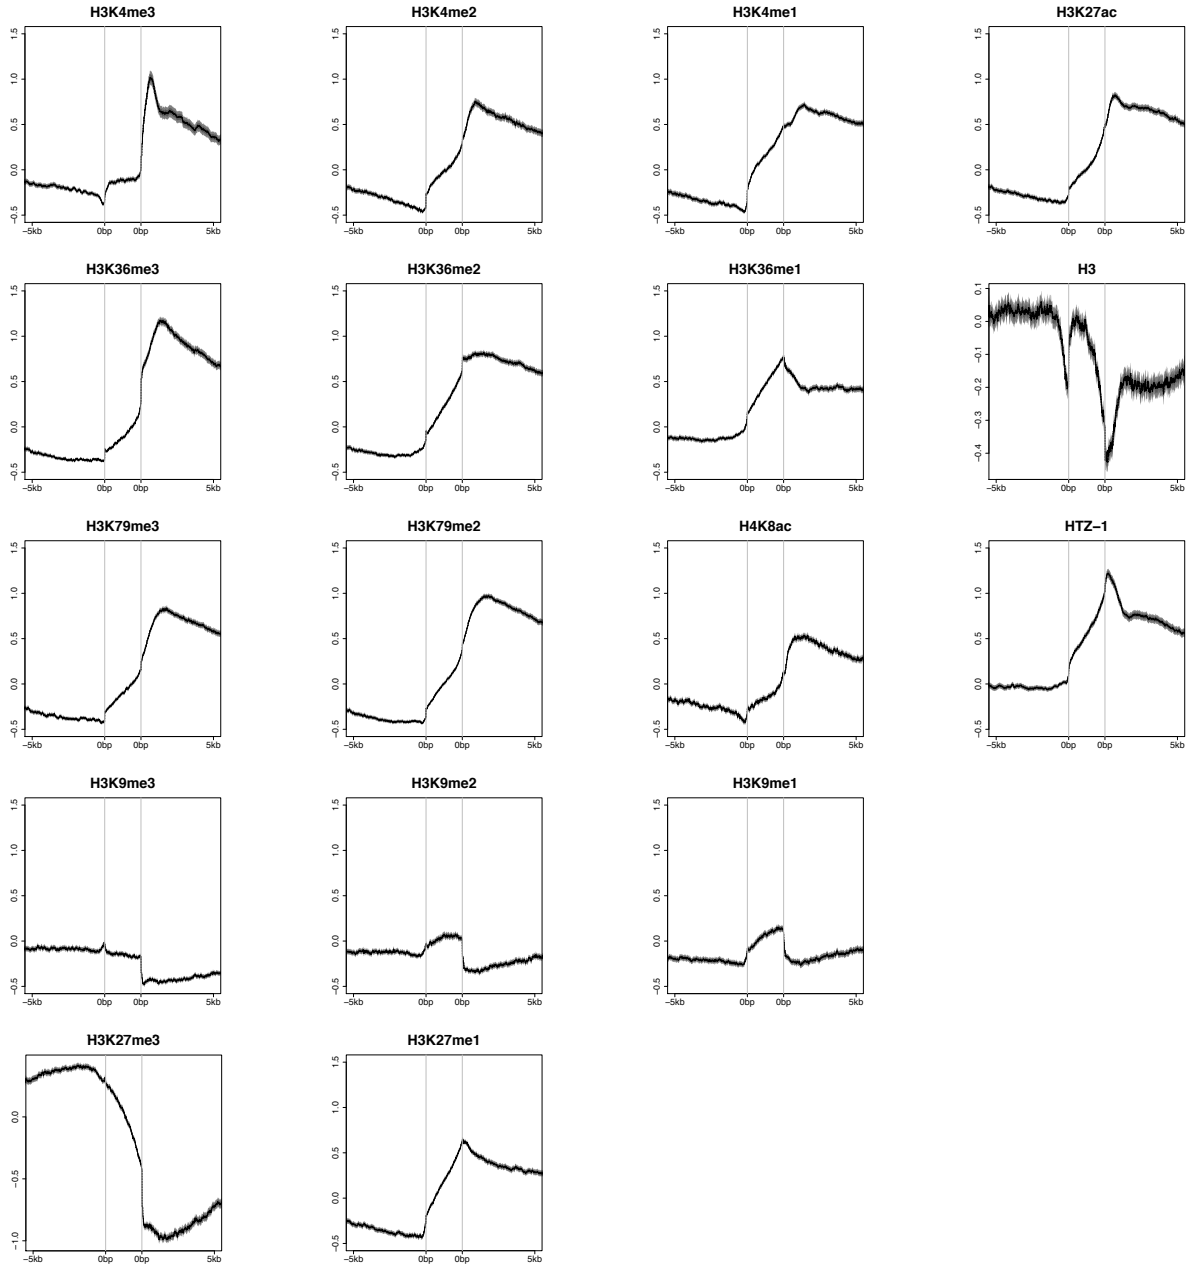

Supplement: pnas.1608162113.sfig06.pdf [file pnas.1608162113.sfig06.pdf]

Evans Figure S7

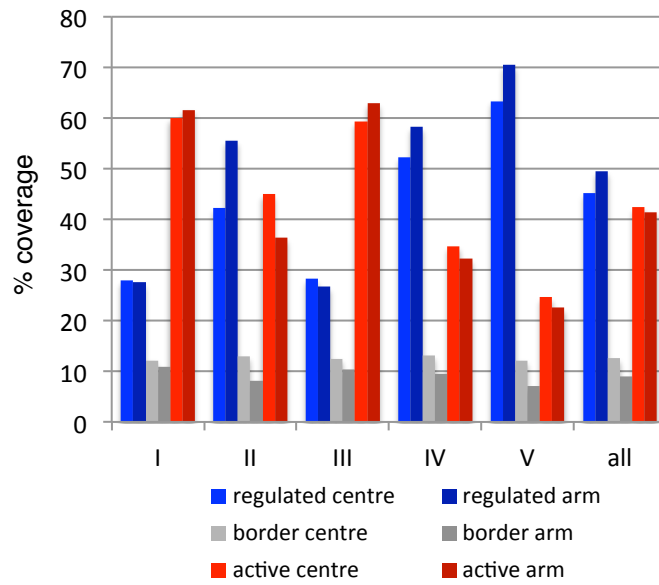

Supplement: pnas.1608162113.sfig07.pdf [file pnas.1608162113.sfig07.pdf]

Evans Figure S8

■ EE ■ L3

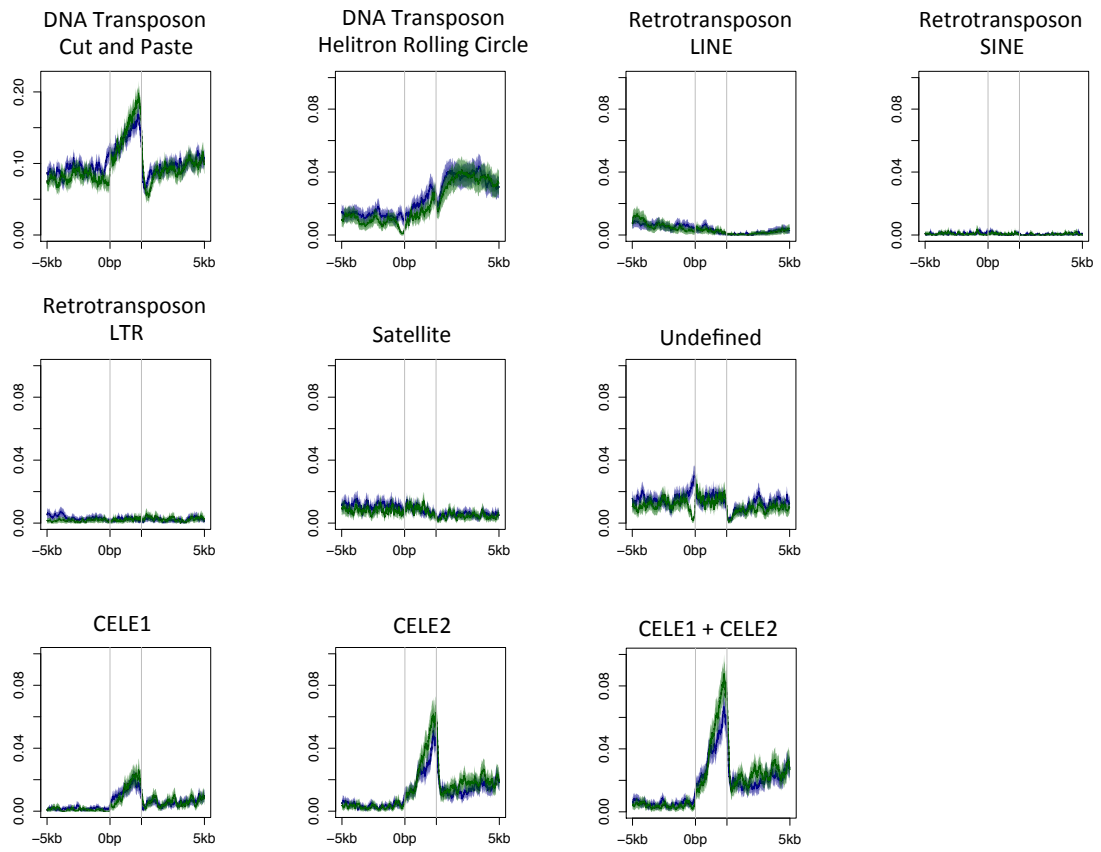

Supplement: pnas.1608162113.sfig08.pdf [file pnas.1608162113.sfig08.pdf]
